# Supplementary material
Source: PubMed Central journal article supplement (PMC2785361)
Supplement: supp_M109.026922_Suppdata.pdf [file supp_M109.026922_Suppdata.pdf]

## Kuszk et al. Supplemental Figure 1

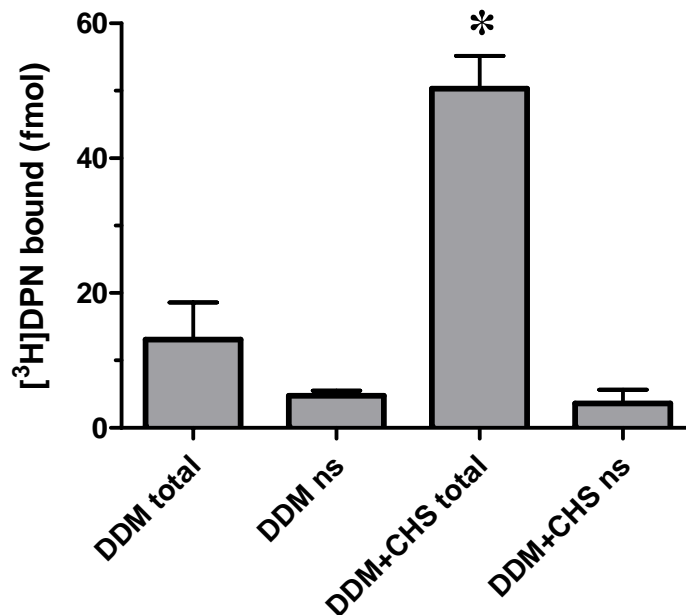

The inclusion of cholesteryl hemisuccinate (CHS) during n-dodecyl- $\beta$ -D-maltoside (DDM) solubilization stabilizes YMOR. YMOR was solubilized from the plasma membranes of Sf9 cells with 1% DDM in the presence or absence of 0.01% CHS and then enriched on a Talon™ IMAC column in either 0.1% DDM or 0.1% DDM plus 0.01% CHS. [<sup>3</sup>H]DPN binding to these detergent solubilized YMOR samples was then measured in the absence (total) or presence (NS) of 20  $\mu$ M naltrexone. Addition of CHS to solubilized YMOR increased [<sup>3</sup>H]DPN ~3.8-fold, suggesting an improvement in the amount of receptor in an active conformation. Error bars represent the Standard Error of the Mean of two experiments performed in duplicate. \*P<0.05, significantly different from DDM total as calculated by a Student's t-test.

## Kuszk et al. Supplemental Figure 2

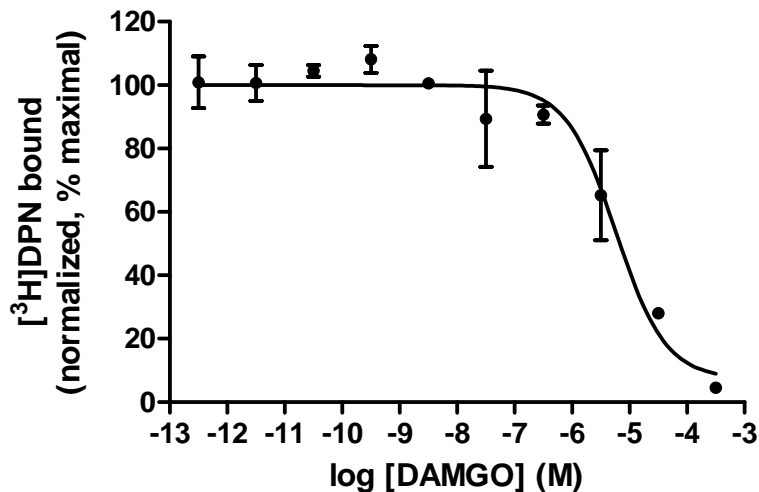

DAMGO displays low affinity binding to rHDL•YMOR. An estimated 15 fmoles of rHDL•YMOR was incubated with 1 nM [<sup>3</sup>H]DPN and increasing concentrations of DAMGO in 25 mM Tris•HCl, pH 7.7, 100 mM NaCl, 0.1% BSA. DAMGO competed [<sup>3</sup>H]DPN binding with a  $K_i$  of ~1.9  $\mu$ M, indicating that in the absence of G protein heterotrimer coupling DAMGO binds YMOR with low affinity. These data corroborate those in Figures 1d and 4b, which illustrated that DAMGO binds YMOR with low affinity when  $G_{12}$  heterotrimer is uncoupled from the receptor by the addition of 10  $\mu$ M  $GTP\gamma S$ . Data is representative of three experiments performed in duplicate. Error bars represent the Standard Error of the Mean.

## Kuszek et al. Supplemental Figure 3

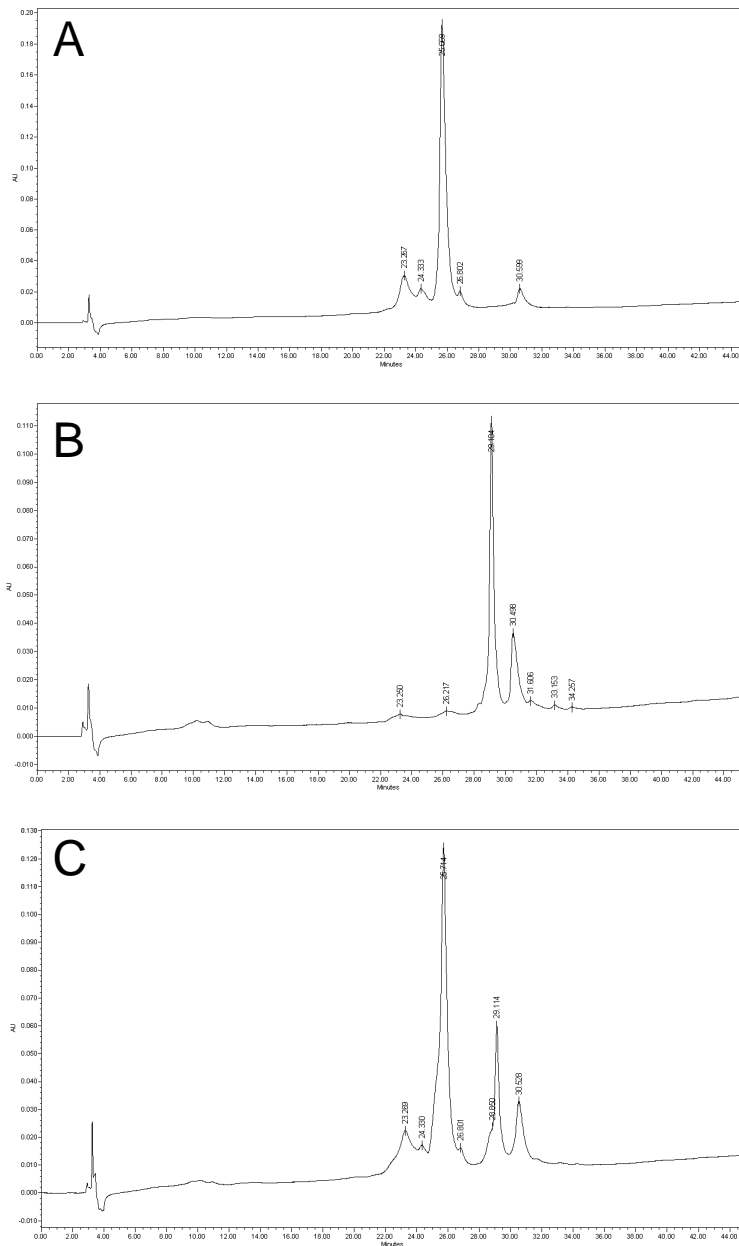

[Lys<sup>7</sup>, Cys<sup>8</sup>]dermorphin was synthesized on Rink resin using an Applied Biosystems Peptide Synthesizer and Fmoc chemistry. Samples were resolved on a Waters reverse phase HPLC using a Vydac C18 10 micron column, run on a linear gradient of 0 to 45% acetonitrile containing 0.1% TFA in an aqueous phase containing 0.1% TFA at 35°C. Samples were monitored at 254 nm. [Lys<sup>7</sup>, Cys<sup>8</sup>]dermorphin (**A**) has a retention time of 25.9 min and was determined to be 98% pure before labeling. [Lys<sup>7</sup>, Cys<sup>8</sup>]dermorphin was labeled with Cy3-maleimide dye (GE Healthcare) at a ratio of 1.5:1 peptide:fluorophore. [Lys<sup>7</sup>, Cys<sup>8</sup>]dermorphin-Cy3 (**B**) has a retention time of 29.2 min and was determined to be 91% pure before use in binding assays and imaging experiments. A mixture and co-elution profile (**C**) shows that the two compounds are well separated.

## Kuszak et al. Supplemental Figure 4

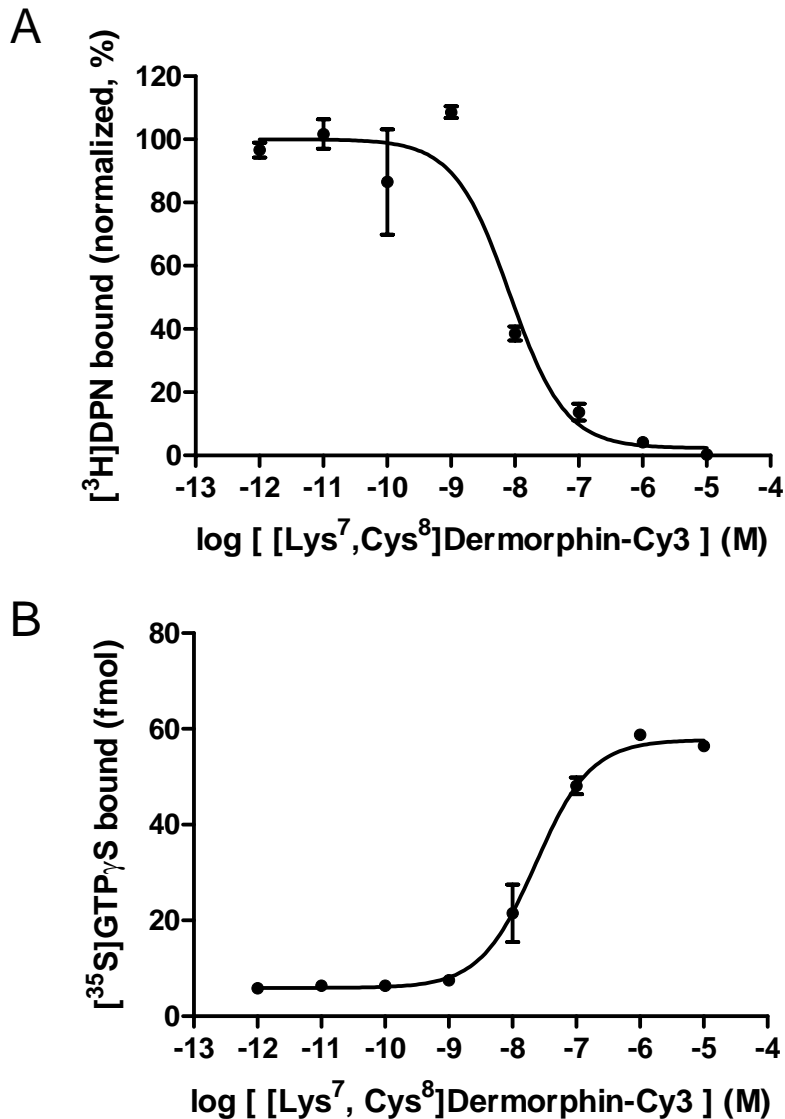

A Cy3-labeled  $[\text{Lys}^7, \text{Cys}^8]\text{dermorphin}$  retains agonist properties at YMOR. Approximately 50 fmoles of receptor in HDL particles were coupled to purified  $\text{G}_{12}$  heterotrimer at a ratio of 30:1 G protein:YMOR. **(A)**  $[\text{Lys}^7, \text{Cys}^8]\text{dermorphin-Cy3}$  binds  $\text{rHDL}\cdot\text{YMOR}+\text{G}_{12}$  with high affinity, displaying a  $K_i$  of 3.3 nM in competition assays against 0.75 nM  $[^3\text{H}]\text{DPN}$ . The single high affinity binding site suggested by the monophasic competition curve is due to the high molar ratio of G protein addition to YMOR, which results in nearly all of the receptor being coupled to  $\text{G}_{12}$  heterotrimer. Data is normalized to the maximal binding level as calculated by a one-site competition curve fit (Prism 5.0, GraphPad). **(B)**  $[\text{Lys}^7, \text{Cys}^8]\text{dermorphin-Cy3}$  stimulated  $[^{35}\text{S}]\text{GTP}\gamma\text{S}$  binding to  $\text{rHDL}\cdot\text{YMOR}+\text{G}_{12}$  with an  $\text{EC}_{50}$  of 23.05 nM. Approximately 52 fmoles of  $[^{35}\text{S}]\text{GTP}\gamma\text{S}$  binding was stimulated, suggesting a 1:1 YMOR: $\text{G}_{12}$  coupling, confirming the fact that adding  $\text{G}_{12}$  at a 30:1 molar ration results in complete coupling of YMOR. Data are representative of three experiments performed in duplicate are shown. Error bars represent the Standard Error of the Mean.
